# Supplementary material for: 3D Ni3S2nanosheet arrays supported on Ni foam for high-performance supercapacitor and non-enzymatic glucose detection
Source: Royal Society of Chemistry journal article supplement (doi:10.1039/c4ta02857k), 2014-07-22
Supplement: c4ta02857k1.pdf [file c4ta02857k1.pdf]

## Supporting Information

### 3D Ni<sub>3</sub>S<sub>2</sub> nanosheet arrays supported on Ni foam for high-performance supercapacitor and non-enzymatic glucose detection

Huanhuan Huo, Yongqing Zhao, Cailing Xu\*

State Key Laboratory of Applied Organic Chemistry, Key Laboratory of Nonferrous Metal

Chemistry and Resources Utilization of Gansu Province, College of Chemistry and Chemical

Engineering, Lanzhou University, Lanzhou, 730000, China

\*Corresponding author:

Cailing Xu: Tel: +86-931-891-2589, FAX: +86-931-891-2582, Email: xucl@lzu.edu.cn

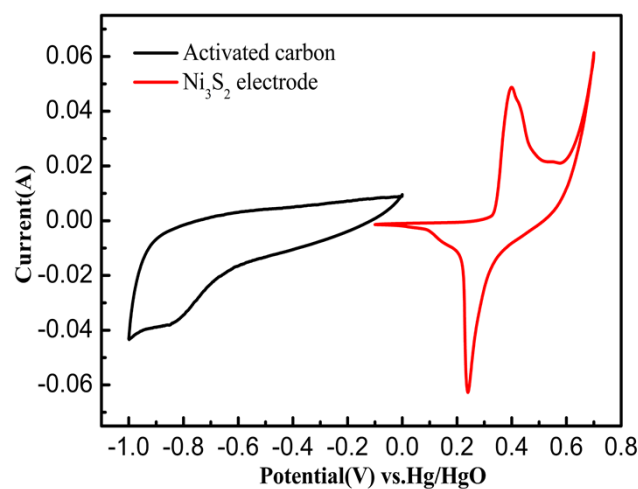

Fig. S1 CV curves of activated carbon electrode and the Ni<sub>3</sub>S<sub>2</sub> electrode measured at a scan rate of 10 mV s<sup>-1</sup>.

The specific capacitance of the electrode can be calculated from the CV curves according to the following equation:

$$C = \frac{\int IdV}{\nu m \Delta V}$$

Where C (F g<sup>-1</sup>) is the specific capacitance of the electrode, I (A) is the voltammetric current,  $\nu$  (mV s<sup>-1</sup>) is the scan rate,  $\Delta V$  (V) is the total potential window, and m (g) is the mass of active material within the electrode.

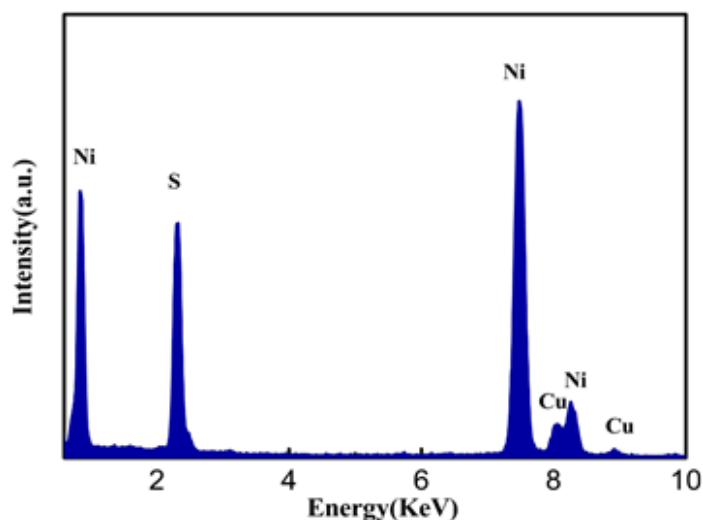

Fig. S2. The EDS spectra of the as-prepared Ni<sub>3</sub>S<sub>2</sub>.

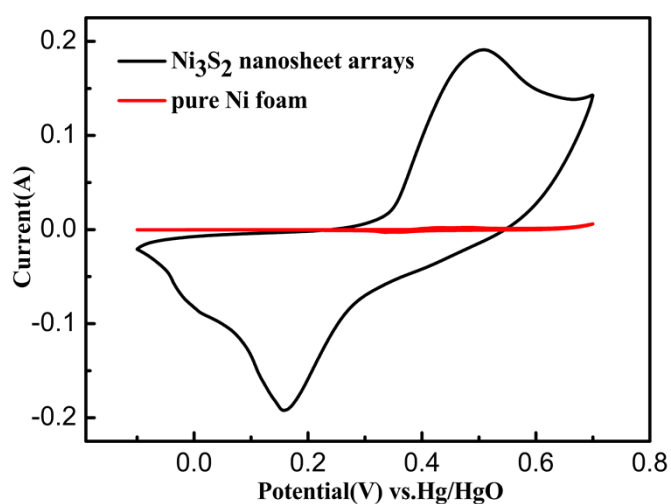

Fig.S3 CV curves of Ni<sub>3</sub>S<sub>2</sub> nanosheet array electrode and pure Ni foam electrode at the scan rate of 50 mV s<sup>-1</sup>.

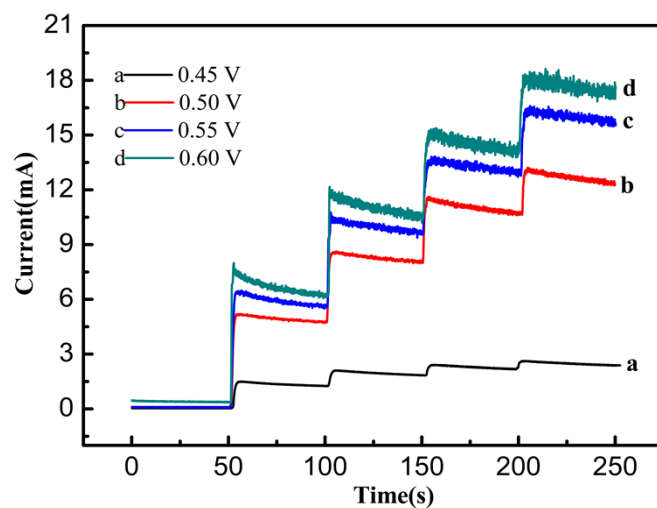

Fig. S4 Amperometric response of the  $\text{Ni}_3\text{S}_2$  nanosheet array electrode at different potentials with successive additions of 1.0 mM glucose (a: 0.45 V, b: 0.50 V, c: 0.55 V and d: 0.60 V).
